# Supplementary material
Source: PubMed Central journal article supplement (PMC1088681)
Supplement: PB010861s01.pdf [file PB010861s01.pdf]

This is an electronic appendix to the paper by Tiffin *et al.* 2001 Asymmetric crossing barriers in angiosperms. *Proc. R. Soc. Lond. B* **268**, 861-867.

Electronic appendices are refereed with the text. However, no attempt has been made to impose a uniform editorial style on the electronic appendices.

## Appendix A

Data on hybrid crosses. Species crossed, the mating system of those species (self-incompatible (SI) or self-compatible (SC)), and measures of reproductive compatibility (seed set, seed viability, and/or fertility of F1 pollen) are presented for each genus. Species pairs that exhibited significant asymmetry in reproductive compatibility are designated by asterisks (\*  $P < 0.05$ , \*\* $P < 0.001$ ) in the columns labeled seed set, viable seed, and F1 pollen viability. Species names are those presented in the original papers (references below). Mating system data are also from the original papers. If species within a genus did not differ in mating system or data on mating system were not available the column on mating systems was left blank.

**Abbreviations:** seed parent **SP**, pollen parent **PP**, mating system of seed parent **MS**, significant asymmetry measured by seed set **SSS**, significant asymmetry measured by viable seed set **SVS**, significant asymmetry measured by F1 pollen viability **SPV**, crossability index (based on seed set) **CI**, proportion of pollinations resulting in seed **PPS**, proportion of seeds that germinated **PSG**, number of flowers with successful seed set **NFS**, number of flowers pollinated **NFP**, number of florets pollinated **NFLP**, pods per 10 florets **PF**, number of viable seeds **NVS**, number of florets pollinated **NFLP**, F1 pollen viability **F1PV** number of "successful" crosses (those producing viable F1 hybrids) **NVF1**, number of seeds germinated **NSG**, number of seedlings that survived to maturity **NSM**, percent full seeds of pollinated flowers **PFS**.

Genus *Aphelandra* (McDade and Lundberg 1982)

| SP                 | PP                   | MS | SSS | CI    |
|--------------------|----------------------|----|-----|-------|
| <i>A. deppeana</i> | <i>A. panamensis</i> | SI |     | 0.504 |

|                          |                          |    |   |       |
|--------------------------|--------------------------|----|---|-------|
| <i>A. deppeana</i>       | <i>A. golfodulcensis</i> | SI |   | 0.039 |
| <i>A. deppeana</i>       | <i>A. terryae</i>        | SI |   | 0.106 |
| <i>A. deppeana</i>       | <i>A. sinclariana</i>    | SI |   | 0.11  |
| <i>A. deppeana</i>       | <i>A. storkii</i>        | SI |   | 0.142 |
| <i>A. deppeana</i>       | <i>A. lingua-bovis</i>   | SI |   | 0.011 |
| <i>A. deppeana</i>       | <i>A. leonardii</i>      | SI |   | 0.15  |
| <i>A. panamensis</i>     | <i>A. deppeana</i>       | SC |   | 0.89  |
| <i>A. panamensis</i>     | <i>A. gracilis</i>       | SC |   | 0.371 |
| <i>A. panamensis</i>     | <i>A. golfodulcensis</i> | SC |   | 0.643 |
| <i>A. panamensis</i>     | <i>A. terryae</i>        | SC |   | 0.8   |
| <i>A. panamensis</i>     | <i>A. sinclariana</i>    | SC | * | 0.986 |
| <i>A. panamensis</i>     | <i>A. storkii</i>        | SC |   | 0.581 |
| <i>A. panamensis</i>     | <i>A. lingua-bovis</i>   | SC |   | 0     |
| <i>A. panamensis</i>     | <i>A. leonardii</i>      | SC | * | 0.095 |
| <i>A. gracilis</i>       | <i>A. panamensis</i>     | NA |   | 0     |
| <i>A. gracilis</i>       | <i>A. terryae</i>        | NA | * | 0     |
| <i>A. gracilis</i>       | <i>A. storkii</i>        | NA | * | 0     |
| <i>A. gracilis</i>       | <i>A. leonardii</i>      | NA | * | 0     |
| <i>A. golfodulcensis</i> | <i>A. deppeana</i>       | SI |   | 0.173 |
| <i>A. golfodulcensis</i> | <i>A. panamensis</i>     | SI |   | 0.259 |
| <i>A. golfodulcensis</i> | <i>A. terryae</i>        | SI |   | 0.865 |
| <i>A. golfodulcensis</i> | <i>A. sinclariana</i>    | SI |   | 0.98  |
| <i>A. golfodulcensis</i> | <i>A. storkii</i>        | SI | * | 0.51  |
| <i>A. golfodulcensis</i> | <i>A. lingua-bovis</i>   | SI |   | 0.037 |
| <i>A. golfodulcensis</i> | <i>A. leonardii</i>      | SI |   | 0.267 |
| <i>A. terryae</i>        | <i>A. deppeana</i>       | SI |   | 0     |
| <i>A. terryae</i>        | <i>A. panamensis</i>     | SI |   | 0.235 |
| <i>A. terryae</i>        | <i>A. gracilis</i>       | SI | * | 0.594 |
| <i>A. terryae</i>        | <i>A. golfodulcensis</i> | SI |   | 0.554 |
| <i>A. terryae</i>        | <i>A. sinclariana</i>    | SI |   | 0.664 |
| <i>A. terryae</i>        | <i>A. storkii</i>        | SI |   | 0.587 |
| <i>A. terryae</i>        | <i>A. lingua-bovis</i>   | SI |   | 0.034 |
| <i>A. terryae</i>        | <i>A. leonardii</i>      | SI |   | 0.08  |
| <i>A. sinclariana</i>    | <i>A. deppeana</i>       | SI |   | 0.134 |
| <i>A. sinclariana</i>    | <i>A. panamensis</i>     | SI | * | 0.042 |

|                        |                          |    |   |       |
|------------------------|--------------------------|----|---|-------|
| <i>A. sinclariana</i>  | <i>A. golfodulcensis</i> | SI |   | 0.557 |
| <i>A. sinclariana</i>  | <i>A. terryae</i>        | SI |   | 0.265 |
| <i>A. sinclariana</i>  | <i>A. storkii</i>        | SI |   | 0.394 |
| <i>A. sinclariana</i>  | <i>A. lingua-bovis</i>   | SI |   | 0.074 |
| <i>A. sinclariana</i>  | <i>A. leonardii</i>      | SI |   | 0.159 |
| <i>A. storkii</i>      | <i>A. deppeana</i>       | SI |   | 0.294 |
| <i>A. storkii</i>      | <i>A. panamensis</i>     | SI |   | 0.294 |
| <i>A. storkii</i>      | <i>A. gracilis</i>       | SI | * | 0.623 |
| <i>A. storkii</i>      | <i>A. golfodulcensis</i> | SI | * | 0     |
| <i>A. storkii</i>      | <i>A. terryae</i>        | SI |   | 0.294 |
| <i>A. storkii</i>      | <i>A. sinclariana</i>    | SI |   | 0     |
| <i>A. storkii</i>      | <i>A. lingua-bovis</i>   | SI |   | 0     |
| <i>A. storkii</i>      | <i>A. leonardii</i>      | SI |   | 0.095 |
| <i>A. lingua-bovis</i> | <i>A. deppeana</i>       | SC |   | 0.081 |
| <i>A. lingua-bovis</i> | <i>A. panamensis</i>     | SC |   | 0     |
| <i>A. lingua-bovis</i> | <i>A. golfodulcensis</i> | SC |   | 0     |
| <i>A. lingua-bovis</i> | <i>A. terryae</i>        | SC |   | 0     |
| <i>A. lingua-bovis</i> | <i>A. sinclariana</i>    | SC |   | 0     |
| <i>A. lingua-bovis</i> | <i>A. storkii</i>        | SC |   | 0     |
| <i>A. lingua-bovis</i> | <i>A. leonardii</i>      | SC |   | 0     |
| <i>A. leonardii</i>    | <i>A. deppeana</i>       | SI |   | 0.026 |
| <i>A. leonardii</i>    | <i>A. panamensis</i>     | SI | * | 0.902 |
| <i>A. leonardii</i>    | <i>A. gracilis</i>       | SI | * | 0.488 |
| <i>A. leonardii</i>    | <i>A. golfodulcensis</i> | SI |   | 0.127 |
| <i>A. leonardii</i>    | <i>A. terryae</i>        | SI |   | 0.112 |
| <i>A. leonardii</i>    | <i>A. sinclariana</i>    | SI |   | 0.107 |
| <i>A. leonardii</i>    | <i>A. storkii</i>        | SI |   | 0.116 |
| <i>A. leonardii</i>    | <i>A. lingua-bovis</i>   | SI |   | 0.119 |

---

Genus *Cardus*<sup>a</sup> (Gremaud 1981)

---

| SP                      | PP                      | SSS | SVS | SVP | PPS  | PSG  | F1PV  |
|-------------------------|-------------------------|-----|-----|-----|------|------|-------|
| <i>C. carlinifolius</i> | <i>C. carlinifolius</i> |     |     |     | 0.66 | 0.9  | 0.95  |
| <i>C. carlinifolius</i> | <i>C. medius</i>        |     |     |     | 0.05 | 0.8  | 0.71  |
| <i>C. carlinifolius</i> | <i>C. defloratus</i>    |     |     |     | 0.27 | 0.72 | 0.81  |
| <i>C. carlinifolius</i> | <i>C. rhaeticus</i>     |     |     |     | 0.56 | 0.85 | 0.67  |
| <i>C. carlinifolius</i> | <i>C. Ccrassifolius</i> |     |     |     | 0.63 | 0.9  | 0.82  |
| <i>C. carlinifolius</i> | <i>C. medius</i>        |     |     |     | 0.67 | 0.9  | 0.95  |
| <i>C. medius</i>        | <i>C. carlinifolius</i> |     |     |     | 0.88 | 0.98 | 0.998 |
| <i>C. defloratus</i>    | <i>C. carlinifolius</i> |     |     | **  | 0.38 | 0.95 | 0.5   |
| <i>C. defloratus</i>    | <i>C. medius</i>        | **  | **  | *   | 0.03 | 1    | 0.59  |
| <i>C. defloratus</i>    | <i>C. rhaeticus</i>     | **  | **  |     | 0.57 | 0.8  | 0.72  |
| <i>C. defloratus</i>    | <i>C. glaucus</i>       | *   |     |     | 0.82 | 0.77 | 0.5   |
| <i>C. medius</i>        | <i>C. carlinifolius</i> |     | *   | *   | 0.07 | 1    | 0.68  |
| <i>C. medius</i>        | <i>C. defloratus</i>    |     |     |     | 0.69 | 0.8  | 0.76  |
| <i>C. rhaeticus</i>     | <i>C. carlinifolius</i> |     |     | **  | 0.44 | 0.85 | 0.86  |
| <i>C. rhaeticus</i>     | <i>C. defloratus</i>    |     |     |     | 0.06 | 0.9  | 0.7   |
| <i>C. crassifolius</i>  | <i>C. carlinifolius</i> |     | *   |     | 0.5  | 0.5  | 0.85  |
| <i>C. glaucus</i>       | <i>C. defloratus</i>    |     |     |     | 0.56 | 0.95 | 0.46  |

Genus *Cucumis*<sup>a</sup> (Singh and Yadava 1984)

| SP                  | PP                              | SSS | NFSS | NFP | PPS    | F1PV |
|---------------------|---------------------------------|-----|------|-----|--------|------|
| <i>C. dipsaceus</i> | <i>C. myriocarpus</i>           | *   | 5    | 12  | 0.4167 | 0.13 |
| <i>C. dipsaceus</i> | <i>C. zeyheri</i>               |     | 3    | 6   | 0.5    | 0.23 |
| <i>C. dipsaceus</i> | <i>C. prophetarum</i>           | *   | 0    | 16  | 0      |      |
| <i>C. dipsaceus</i> | <i>C. anguria (v. longipus)</i> | *   | 5    | 18  | 0.2778 | 0.17 |

|                                 |                                 |   |    |    |        |      |
|---------------------------------|---------------------------------|---|----|----|--------|------|
| <i>C. dipsaceus</i>             | <i>C. anguria (v. anguria)</i>  |   | 4  | 20 | 0.2    | 0.2  |
| <i>C. dipsaceus</i>             | <i>C. melo (v. momordica)</i>   |   | 0  | 5  | 0      |      |
| <i>C. myriocarpus</i>           | <i>C. dipsaceus</i>             | * | 0  | 11 | 0      |      |
| <i>C. myriocarpus</i>           | <i>C. zeyheri</i>               |   | 0  | 7  | 0      |      |
| <i>C. myriocarpus</i>           | <i>C. anguria (v. longipus)</i> | * | 0  | 10 | 0      |      |
| <i>C. zeyheri</i>               | <i>C. dipsaceus</i>             |   | 0  | 5  |        |      |
| <i>C. zeyheri</i>               | <i>C. myriocarpus</i>           |   | 2  | 5  | 0.4    | 0.22 |
| <i>C. zeyheri</i>               | <i>C. prophetarum</i>           | * | 2  | 20 | 0.1    |      |
| <i>C. zeyheri</i>               | <i>C. anguria (v. longipus)</i> |   | 2  | 4  | 0.5    | 0.16 |
| <i>C. prophetarum</i>           | <i>C. dipsaceus</i>             | * | 6  | 15 | 0.4    | 0.26 |
| <i>C. prophetarum</i>           | <i>C. zeyheri</i>               | * | 10 | 20 | 0.5    | 0.23 |
| <i>C. prophetarum</i>           | <i>C. anguria (v. longipus)</i> |   | 3  | 6  | 0.5    | 0.2  |
| <i>C. prophetarum</i>           | <i>C. anguria (v. anguria)</i>  |   | 11 | 15 | 0.7333 | 0.17 |
| <i>C. prophetarum</i>           | <i>C. melo (v. momordica)</i>   |   | 0  | 5  | 0      |      |
| <i>C. anguria (v. longipus)</i> | <i>C. dipsaceus</i>             | * | 0  | 31 | 0      |      |
| <i>C. anguria (v. longipus)</i> | <i>C. myriocarpus</i>           | * | 13 | 30 | 0.4333 |      |
| <i>C. anguria (v. longipus)</i> | <i>C. zeyheri</i>               |   | 5  | 11 | 0.4545 |      |
| <i>C. anguria (v. longipus)</i> | <i>C. prophetarum</i>           |   | 4  | 42 | 0.0952 | 0.82 |
| <i>C. anguria (v. longipus)</i> | <i>C. anguria (v. anguria)</i>  |   | 18 | 40 | 0.45   | 0.8  |
| <i>C. anguria (v. longipus)</i> | <i>C. melo (v. momordica)</i>   |   | 0  | 12 | 0      |      |
| <i>C. anguria (v. anguria)</i>  | <i>C. dipsaceus</i>             |   | 0  | 12 | 0      |      |
| <i>C. anguria (v. anguria)</i>  | <i>C. prophetarum</i>           |   | 0  | 3  | 0      |      |
| <i>C. anguria (v. anguria)</i>  | <i>C. anguria (v. longipus)</i> |   | 7  | 30 | 0.2333 | 0.8  |
| <i>C. melo (v. momordica)</i>   | <i>C. dipsaceus</i>             |   | 0  | 20 | 0      |      |
| <i>C. melo (v. momordica)</i>   | <i>C. prophetarum</i>           |   | 0  | 10 | 0      |      |
| <i>C. melo (v. momordica)</i>   | <i>C. anguria (v. longipus)</i> |   | 0  | 15 | 0      |      |

---

Genus *Guizota*<sup>a</sup> (Dagne 1994)

---

| SP                              | PP                              | SSS | NFS | NFP | PPS    | F1PV |
|---------------------------------|---------------------------------|-----|-----|-----|--------|------|
| <i>G. abyssinica</i>            | <i>G. scabra ssp. schimperi</i> | **  | 20  | 137 | 0.146  |      |
| <i>G. abyssinica</i>            | <i>G. scabra ssp. scabra</i>    | **  | 29  | 75  | 0.3867 |      |
| <i>G. abyssinica</i>            | <i>G. villosa</i>               | **  | 66  | 182 | 0.3626 |      |
| <i>G. scabra ssp. schimperi</i> | <i>G. abyssinica</i>            | **  | 192 | 320 | 0.6    | 0.81 |
| <i>G. scabra ssp. schimperi</i> | <i>G. scabra ssp. scabra</i>    | *   | 29  | 36  | 0.8056 |      |
| <i>G. scabra ssp. schimperi</i> | <i>G. villosa</i>               | *   | 0   | 8   | 0      |      |
| <i>G. scabra ssp. scabra</i>    | <i>G. abyssinica</i>            | **  | 7   | 110 | 0.0636 | 0.47 |
| <i>G. scabra ssp. scabra</i>    | <i>G. scabra ssp. schimperi</i> | *   | 23  | 48  | 0.4792 | 0.49 |
| <i>G. scabra ssp. scabra</i>    | <i>G. villosa</i>               |     | 20  | 24  | 0.8333 |      |
| <i>G. villosa</i>               | <i>G. abyssinica</i>            | **  | 13  | 215 | 0.0605 | 0.31 |
| <i>G. villosa</i>               | <i>G. scabra ssp. schimperi</i> | *   | 96  | 200 | 0.48   | 0.35 |
| <i>G. villosa</i>               | <i>G. scabra ssp. scabra</i>    |     | 27  | 33  | 0.8182 | 0.47 |

Genus *Heuchera* (Wells 1979)

| SP                               | PP                                   | MS | SSS | SVP | NFS | NFP | PSG  | CI   |
|----------------------------------|--------------------------------------|----|-----|-----|-----|-----|------|------|
| <i>H. americana v. americana</i> | <i>H. americana v. americana</i>     | SI |     |     | 30  | 31  | 0.92 | 0.92 |
| <i>H. americana v. americana</i> | <i>H. americana v. hispida</i>       | SI |     |     | 35  | 35  | 1    |      |
| <i>H. americana v. americana</i> | <i>H. americana v. hirsuticaulis</i> | SI |     |     | 4   | 5   | .    |      |
| <i>H. americana v. americana</i> | <i>H. caroliniana</i>                | SI |     |     | 11  | 12  | .    |      |
| <i>H. americana v. americana</i> | <i>H. longiflora</i>                 | SI |     |     | 37  | 39  | 0.98 | 0.95 |
| <i>H. americana v. americana</i> | <i>H. pubescens</i>                  | SI |     |     | 35  | 36  | .    | 0.55 |
| <i>H. americana v. americana</i> | <i>H. richardsonii</i>               | SI |     | **  | 29  | 30  | 0.92 | 0.75 |
| <i>H. americana v. americana</i> | <i>H. parviflora</i>                 | SI | **  |     | 2   | 40  | 0    |      |
| <i>H. americana v. americana</i> | <i>H. villosa</i>                    | SI | *   |     | 3   | 19  | 0.14 |      |

|                                    |                                    |    |    |    |    |      |      |
|------------------------------------|------------------------------------|----|----|----|----|------|------|
| <i>H. americana v. hispida</i>     | <i>H. americana v.americana</i>    | SI |    | 15 | 15 | 0.8  |      |
| <i>H. americana v. hispida</i>     | <i>H. americana v. hispida</i>     | SI |    | 23 | 24 | 0.89 | 0.98 |
| <i>H. americana v. hispida</i>     | <i>H. american v.hirsuticaulis</i> | SI |    | 9  | 10 |      |      |
| <i>H. americana v. hispida</i>     | <i>H. longiflora</i>               | SI |    | 25 | 27 | 1    | 0.97 |
| <i>H. americana v. hispida</i>     | <i>H. pubescens</i>                | SI | *  | 26 | 26 | 0.97 | 0.96 |
| <i>H. americana v. hispida</i>     | <i>H. richardsonii</i>             | SI |    | 22 | 24 | 1    | 0.73 |
| <i>H. americana v. hispida</i>     | <i>H. parviflora</i>               | SI | ** | 0  | 25 |      |      |
| <i>H. americana v. hispida</i>     | <i>H. villosa</i>                  | SI | ** | 0  | 26 |      |      |
| <i>H. american v.hirsuticaulis</i> | <i>H. americana v.americana</i>    | SI |    | 14 | 14 |      |      |
| <i>H. american v.hirsuticaulis</i> | <i>H. americana v. hispida</i>     | SI |    | 17 | 17 |      |      |
| <i>H. american v.hirsuticaulis</i> | <i>H. american v.hirsuticaulis</i> | SI |    | 5  | 5  |      |      |
| <i>H. american v.hirsuticaulis</i> | <i>H. longiflora</i>               | SI |    | 17 | 17 |      |      |
| <i>H. american v.hirsuticaulis</i> | <i>H. pubescens</i>                | SI |    | 25 | 27 |      |      |
| <i>H. american v.hirsuticaulis</i> | <i>H. richardsonii</i>             | SI |    | 16 | 17 |      |      |
| <i>H. caroliniana</i>              | <i>H. americana v.americana</i>    | SI |    | 6  | 6  |      |      |
| <i>H. caroliniana</i>              | <i>H. americana v. hispida</i>     | SI |    | 5  | 5  |      |      |
| <i>H. caroliniana</i>              | <i>H. caroliniana</i>              | SI |    | 10 | 10 |      |      |
| <i>H. caroliniana</i>              | <i>H. pubescens</i>                | SI |    | 5  | 5  |      |      |
| <i>H. caroliniana</i>              | <i>H. richardsonii</i>             | SI |    | 10 | 10 |      |      |
| <i>H. longiflora</i>               | <i>H. americana v.americana</i>    | SI |    | 47 | 48 | 1    | 0.88 |
| <i>H. longiflora</i>               | <i>H. americana v. hispida</i>     | SI |    | 36 | 43 | 0.98 | 0.88 |
| <i>H. longiflora</i>               | <i>H. american v.hirsuticaulis</i> | SI |    | 6  | 6  |      | 0.84 |
| <i>H. longiflora</i>               | <i>H. longiflora</i>               | SI |    | 44 | 49 | 0.91 | 0.97 |
| <i>H. longiflora</i>               | <i>H. pubescens</i>                | SI |    | 52 | 52 | 0.93 | 0.84 |
| <i>H. longiflora</i>               | <i>H. richardsonii</i>             | SI | *  | 48 | 53 | 0.94 | 0.63 |
| <i>H. longiflora</i>               | <i>H. parviflora</i>               | SI | ** | 0  | 51 |      |      |
| <i>H. longiflora</i>               | <i>H. villosa</i>                  | SI | ** | 2  | 40 | 0.43 | 0.42 |
| <i>H. pubescens</i>                | <i>H. americana v.americana</i>    | SI |    | 27 | 33 | 0.95 | 0.87 |
| <i>H. pubescens</i>                | <i>H. americana v. hispida</i>     | SI | *  | 34 | 36 | 1    | 0.78 |
| <i>H. pubescens</i>                | <i>H. american v.hirsuticaulis</i> | SI |    | 19 | 20 |      |      |
| <i>H. pubescens</i>                | <i>H. caroliniana</i>              | SI |    | 14 | 15 |      |      |
| <i>H. pubescens</i>                | <i>H. longiflora</i>               | SI |    | 47 | 48 | 0.98 | 0.86 |
| <i>H. pubescens</i>                | <i>H. pubescens</i>                | SI |    | 49 | 50 | 0.9  | 0.9  |
| <i>H. pubescens</i>                | <i>H. richardsonii</i>             | SI |    | 53 | 56 | 1    | 0.82 |
| <i>H. pubescens</i>                | <i>H. parviflora</i>               | SI | ** | 0  | 32 |      |      |

|                        |                                      |    |    |    |    |      |      |
|------------------------|--------------------------------------|----|----|----|----|------|------|
| <i>H. pubescens</i>    | <i>H. villosa</i>                    | SI | ** | 0  | 46 |      |      |
| <i>H. richardsonii</i> | <i>H. americana v. americana</i>     | SI | ** | 29 | 31 | 1    | 0.84 |
| <i>H. richardsonii</i> | <i>H. americana v. hispida</i>       | SI |    | 51 | 51 | 0.94 |      |
| <i>H. richardsonii</i> | <i>H. americana v. hirsuticaulis</i> | SI |    | 13 | 16 |      |      |
| <i>H. richardsonii</i> | <i>H. caroliniana</i>                | SI |    | 6  | 6  |      |      |
| <i>H. richardsonii</i> | <i>H. longiflora</i>                 | SI | *  | 46 | 49 | 0.95 | 0.77 |
| <i>H. richardsonii</i> | <i>H. pubescens</i>                  | SI |    | 47 | 50 | 0.87 | 0.88 |
| <i>H. richardsonii</i> | <i>H. richardsonii</i>               | SI |    | 47 | 48 | 0.98 | 0.87 |
| <i>H. richardsonii</i> | <i>H. parviflora</i>                 | SI |    | 0  | 15 |      |      |
| <i>H. richardsonii</i> | <i>H. villosa</i>                    | SI | ** | 2  | 35 | 0    |      |
| <i>H. parviflora</i>   | <i>H. americana v. americana</i>     | SC | ** | 22 | 30 | 0.15 |      |
| <i>H. parviflora</i>   | <i>H. americana v. hispida</i>       | SC | ** | 18 | 23 | 0.5  |      |
| <i>H. parviflora</i>   | <i>H. longiflora</i>                 | SC | ** | 17 | 28 | 0.1  |      |
| <i>H. parviflora</i>   | <i>H. pubescens</i>                  | SC | ** | 17 | 22 | 0.5  | 0.18 |
| <i>H. parviflora</i>   | <i>H. richardsonii</i>               | SC |    | 0  | 7  |      |      |
| <i>H. parviflora</i>   | <i>H. parviflora</i>                 | SC |    | 32 | 40 | 0.65 | 0.98 |
| <i>H. parviflora</i>   | <i>H. villosa</i>                    | SC |    | 23 | 31 | 0.47 |      |
| <i>H. villosa</i>      | <i>H. americana v. americana</i>     | SI | *  | 25 | 34 | 0.84 | 0.37 |
| <i>H. villosa</i>      | <i>H. americana v. hispida</i>       | SI | ** | 18 | 27 | 0.83 | 0.37 |
| <i>H. villosa</i>      | <i>H. longiflora</i>                 | SI | ** | 20 | 26 | 0.89 | 0.67 |
| <i>H. villosa</i>      | <i>H. pubescens</i>                  | SI | ** | 16 | 21 | 0.9  | 0.59 |
| <i>H. villosa</i>      | <i>H. richardsonii</i>               | SI | ** | 11 | 15 |      | 0.01 |
| <i>H. villosa</i>      | <i>H. parviflora</i>                 | SI |    | 29 | 34 | 0.68 | 0.67 |
| <i>H. villosa</i>      | <i>H. villosa</i>                    | SI |    | 29 | 37 | 0.93 | 0.97 |

Genus *Ipomoea* (Diaz et al.1996)

| SP                        | PP                    | MS | SSS | SVP | NFP | NFS | PPS    | F1PG |
|---------------------------|-----------------------|----|-----|-----|-----|-----|--------|------|
| <i>I. cordata-triloba</i> | <i>I. x leucantha</i> | SC |     |     | 92  | 34  | 0.3696 |      |



|                           |                           |    |      |     |     |        |      |
|---------------------------|---------------------------|----|------|-----|-----|--------|------|
| <i>I. cordata-triloba</i> | <i>I. trifida</i>         | SC |      | 204 | 6   | 0.0294 | 0.72 |
| <i>I. cordata-triloba</i> | <i>I. triloba</i>         | SC | **   | 245 | 98  | 0.4    |      |
| <i>I. cynanchifolia</i>   | <i>I. grandifolia</i>     | SC |      | 11  | 6   | 0.5455 | 0.63 |
| <i>I. cynanchifolia</i>   | <i>I. triloba</i>         | SC | * ** | 6   | 1   | 0.1667 | 0.76 |
| <i>I. grandifolia</i>     | <i>I. cynanchifolia</i>   | SC |      | 15  | 10  | 0.6667 | 0.64 |
| <i>I. grandifolia</i>     | <i>I. lacunosa</i>        | SC |      | 6   | 3   | 0.5    |      |
| <i>I. grandifolia</i>     | <i>I. x leucantha</i>     | SC |      | 12  | 3   | 0.25   | 0.58 |
| <i>I. lacunosa</i>        | <i>I. grandifolia</i>     | SC |      | 3   | 1   | 0.3333 | 0.24 |
| <i>I. x leucantha</i>     | <i>I. cordata-triloba</i> | SC |      | 206 | 78  | 0.3786 | 0.08 |
| <i>I. x leucantha</i>     | <i>I. grandifolia</i>     | SC |      | 8   | 4   | 0.5    | 0.55 |
| <i>I. x leucantha</i>     | <i>I. trifida</i>         | SC | **   | 41  | 3   | 0.0732 | 0.44 |
| <i>I. ramosissima</i>     | <i>I. trifida</i>         | SC | **   | 15  | 3   | 0.2    | 0.51 |
| <i>I. trifida</i>         | <i>I. cordata-triloba</i> | SI |      | 789 | 7   | 0.0089 |      |
| <i>I. trifida</i>         | <i>I. x leucantha</i>     | SI | **   | 165 | 1   | 0.0061 | 0.92 |
| <i>I. trifida</i>         | <i>I. ramosissima</i>     | SI | **   | 87  | 3   | 0.0345 | 0.02 |
| <i>I. triloba</i>         | <i>I. cordata-triloba</i> | SC | **   | 321 | 225 | 0.7009 | 0.64 |
| <i>I. triloba</i>         | <i>I. cynanchifolia</i>   | SC | * ** | 12  | 10  | 0.8333 | 0.37 |

Genus *Leucaena* diploids<sup>b</sup> (Sorensen and Brewbaker 1994)

| SP                  | PP                                     | SSS | NFLP | PF   | NVS  | CI  |
|---------------------|----------------------------------------|-----|------|------|------|-----|
| <i>L. collinsii</i> | <i>L. collinsii</i>                    |     | 594  | 0.02 | 0    | 0   |
| <i>L. collinsii</i> | <i>L. diversifolia ssp. trichandra</i> | **  | 245  | 0.6  | 4.9  | 0.5 |
| <i>L. collinsii</i> | <i>L. esculenta</i>                    |     | 344  | 0.3  | 5.68 | 4.8 |
| <i>L. collinsii</i> | <i>L. greggii</i>                      |     | 140  | 0.07 | 0.98 | 0.2 |

|                                        |                                        |    |     |      |       |     |
|----------------------------------------|----------------------------------------|----|-----|------|-------|-----|
| <i>L. collinsii</i>                    | <i>L. lanceolata</i>                   | ** | 63  | 4.6  | 340.2 | 116 |
| <i>L. collinsii</i>                    | <i>L. macrophyla</i>                   |    | 90  | 0.7  | 63    | 15  |
| <i>L. collinsii</i>                    | <i>L. multicapitula</i>                | ** | 71  | 0.7  | 56.8  | 17  |
| <i>L. collinsii</i>                    | <i>L. pulverulenta</i>                 | ** | 49  | 2    | 39.2  | 17  |
| <i>L. collinsii</i>                    | <i>L. retusa</i>                       |    | 197 | 0    | 0     | 0   |
| <i>L. collinsii</i>                    | <i>L. salvadorensis</i>                | ** | 172 | 0.6  | 49.88 | 6   |
| <i>L. collinsii</i>                    | <i>L. shannonii</i>                    | *  | 262 | 2.1  | 445.4 | 37  |
| <i>L. collinsii</i>                    | <i>L. trichoides</i>                   |    | 33  | 0.3  | 0     | 0   |
| <i>L. diversifolia ssp. trichandra</i> | <i>L. collinsii</i>                    | ** | 392 | 2.2  | 901.6 | 82  |
| <i>L. diversifolia ssp. trichandra</i> | <i>L. diversifolia ssp. trichandra</i> |    | 335 | 0.1  | 0     | 0   |
| <i>L. diversifolia ssp. trichandra</i> | <i>L. esculenta</i>                    |    | 301 | 0.9  | 66.22 | 8   |
| <i>L. diversifolia ssp. trichandra</i> | <i>L. greggii</i>                      |    | 100 | 0.4  | 11    | 3.9 |
| <i>L. diversifolia ssp. trichandra</i> | <i>L. lanceolata</i>                   | ** | 301 | 2.9  | 933.1 | 108 |
| <i>L. diversifolia ssp. trichandra</i> | <i>L. macrophyla</i>                   |    | 108 | 0.7  | 75.6  | 26  |
| <i>L. diversifolia ssp. trichandra</i> | <i>L. multicapitula</i>                | ** | 69  | 4.8  | 131.1 | 68  |
| <i>L. diversifolia ssp. trichandra</i> | <i>L. pulverulenta</i>                 | ** | 131 | 1.5  | 104.8 | 29  |
| <i>L. diversifolia ssp. trichandra</i> | <i>L. retusa</i>                       |    | 172 | 0.3  | 0     | 0   |
| <i>L. diversifolia ssp. trichandra</i> | <i>L. salvadorensis</i>                |    | 109 | 3.6  | 87.2  | 28  |
| <i>L. diversifolia ssp. trichandra</i> | <i>L. shannonii</i>                    | ** | 190 | 2.8  | 399   | 72  |
| <i>L. diversifolia ssp. trichandra</i> | <i>L. trichoides</i>                   |    | 129 | 0.8  | 0     | 0   |
| <i>L. esculenta</i>                    | <i>L. collinsii</i>                    |    | 303 | 0    | 0     | 0   |
| <i>L. esculenta</i>                    | <i>L. diversifolia ssp. trichandra</i> |    | 272 | 0    | 0     | 0   |
| <i>L. esculenta</i>                    | <i>L. esculenta</i>                    |    | 175 | 0    | 0     | 0   |
| <i>L. esculenta</i>                    | <i>L. lanceolata</i>                   |    | 388 | 0    | 0     | 0   |
| <i>L. esculenta</i>                    | <i>L. macrophyla</i>                   |    | 120 | 0    | 0     | 0   |
| <i>L. esculenta</i>                    | <i>L. multicapitula</i>                |    | 17  | 0    | 0     | 0   |
| <i>L. esculenta</i>                    | <i>L. pulverulenta</i>                 |    | 184 | 0    | 0     | 0   |
| <i>L. esculenta</i>                    | <i>L. retusa</i>                       | ** | 135 | 0.4  | 0     | 0   |
| <i>L. esculenta</i>                    | <i>L. salvadorensis</i>                | ** | 307 | 0.07 | 2.15  | 0.9 |
| <i>L. esculenta</i>                    | <i>L. shannonii</i>                    |    | 133 | 0.2  | 26.6  | 28  |
| <i>L. esculenta</i>                    | <i>L. trichoides</i>                   |    | 85  | 0    | 0     | 0   |
| <i>L. greggii</i>                      | <i>L. collinsii</i>                    |    | 127 | 0.2  | 0     | 0   |
| <i>L. greggii</i>                      | <i>L. diversifolia ssp. trichandra</i> |    | 20  | 0    | 0     | 0   |
| <i>L. greggii</i>                      | <i>L. greggii</i>                      |    | 132 | 0    | 0     | 0   |
| <i>L. greggii</i>                      | <i>L. lanceolata</i>                   |    | 10  | 1    | 3     | 17  |
| <i>L. greggii</i>                      | <i>L. macrophyla</i>                   |    | 25  | 0    | 0     | 0   |
| <i>L. greggii</i>                      | <i>L. pulverulenta</i>                 |    | 144 | 0    | 0     | 0   |

|                         |                                       |    |     |      |       |     |
|-------------------------|---------------------------------------|----|-----|------|-------|-----|
| <i>L. greggii</i>       | <i>L. retusa</i>                      |    | 191 | 0.05 | 9.55  | 2.6 |
| <i>L. greggii</i>       | <i>L. salvadorensis</i>               |    | 65  | 0    | 0     | 0   |
| <i>L. greggii</i>       | <i>L. shannonii</i>                   |    | 15  | 2.7  | 0     | 0   |
| <i>L. lanceolata</i>    | <i>L. collinsii</i>                   | ** | 469 | 3    | 2017  | 53  |
| <i>L. lanceolata</i>    | <i>L. diversifolia ssp.trichandra</i> | ** | 560 | 0.3  | 140   | 3.1 |
| <i>L. lanceolata</i>    | <i>L. esculenta</i>                   |    | 236 | 0    | 0     | 0   |
| <i>L. lanceolata</i>    | <i>L. greggii</i>                     |    | 25  | 6    | 11    | 5   |
| <i>L. lanceolata</i>    | <i>L. lanceolata</i>                  |    | 341 | 0.03 | 0     | 0   |
| <i>L. lanceolata</i>    | <i>L. macrophyla</i>                  | *  | 293 | 0.7  | 205.1 | 9   |
| <i>L. lanceolata</i>    | <i>L. multicapitula</i>               |    | 30  | 2.3  | 72    | 1.7 |
| <i>L. lanceolata</i>    | <i>L. pulverulenta</i>                |    | 159 | 1.7  | 254.4 | 19  |
| <i>L. lanceolata</i>    | <i>L. retusa</i>                      |    | 230 | 0    | 0     | 0   |
| <i>L. lanceolata</i>    | <i>L. salvadorensis</i>               |    | 259 | 4.1  | 543.9 | 25  |
| <i>L. lanceolata</i>    | <i>L. shannonii</i>                   | ** | 545 | 4.2  | 2725  | 62  |
| <i>L. lanceolata</i>    | <i>L. trichoides</i>                  | *  | 391 | 0.2  | 54.74 | 1.8 |
| <i>L. macrophyla</i>    | <i>L. collinsii</i>                   |    | 130 | 2.8  | 273   | 94  |
| <i>L. macrophyla</i>    | <i>L. diversifolia ssp.trichandra</i> |    | 125 | 0.2  | 22.5  | 8   |
| <i>L. macrophyla</i>    | <i>L. esculenta</i>                   |    | 92  | 0    | 0     | 0   |
| <i>L. macrophyla</i>    | <i>L. greggii</i>                     |    | 125 | 0    | 0     | 0   |
| <i>L. macrophyla</i>    | <i>L. lanceolata</i>                  | *  | 606 | 0.7  | 272.7 | 20  |
| <i>L. macrophyla</i>    | <i>L. macrophyla</i>                  |    | 85  | 0    | 0     | 2   |
| <i>L. macrophyla</i>    | <i>L. multicapitula</i>               |    | 17  | 1.2  | 18.7  | 51  |
| <i>L. macrophyla</i>    | <i>L. pulverulenta</i>                | ** | 148 | 1.5  | 28.12 | 22  |
| <i>L. macrophyla</i>    | <i>L. retusa</i>                      |    | 180 | 0    | 0     | 0   |
| <i>L. macrophyla</i>    | <i>L. salvadorensis</i>               |    | 152 | 0    | 0     | 0   |
| <i>L. macrophyla</i>    | <i>L. shannonii</i>                   |    | 153 | 0.3  | 0     | 0   |
| <i>L. macrophyla</i>    | <i>L. trichoides</i>                  |    | 137 | 1.9  | 219.2 | 73  |
| <i>L. multicapitula</i> | <i>L. collinsii</i>                   | ** | 71  | 1.3  | 22.72 | 9   |
| <i>L. multicapitula</i> | <i>L. diversifolia ssp.trichandra</i> | ** | 33  | 1.8  | 0     | 0   |
| <i>L. multicapitula</i> | <i>L. esculenta</i>                   |    | 79  | 0    | 0     | 0   |
| <i>L. multicapitula</i> | <i>L. lanceolata</i>                  |    | 93  | 5.3  | 334.8 | 96  |
| <i>L. multicapitula</i> | <i>L. macrophyla</i>                  |    | 50  | 6    | 270   | 143 |
| <i>L. multicapitula</i> | <i>L. multicapitula</i>               |    | 102 | 0.9  | 61.2  | 17  |
| <i>L. multicapitula</i> | <i>L. pulverulenta</i>                |    | 13  | 3.8  | 0     | 0   |
| <i>L. multicapitula</i> | <i>L. retusa</i>                      |    | 40  | 0    | 0     | 0   |
| <i>L. multicapitula</i> | <i>L. salvadorensis</i>               |    | 74  | 0.3  | 10.36 | 3.6 |
| <i>L. multicapitula</i> | <i>L. shannonii</i>                   |    | 59  | 0    | 0     | 0   |

|                         |                                       |    |     |      |       |     |
|-------------------------|---------------------------------------|----|-----|------|-------|-----|
| <i>L. multicapitula</i> | <i>L. trichoides</i>                  | ** | 131 | 3.7  | 157.2 | 32  |
| <i>L. pulverulenta</i>  | <i>L. collinsii</i>                   | ** | 231 | 5.2  | 1802  | 83  |
| <i>L. pulverulenta</i>  | <i>L. diversifolia ssp.trichandra</i> | ** | 91  | 1.5  | 30.03 | 3.5 |
| <i>L. pulverulenta</i>  | <i>L. esculenta</i>                   |    | 100 | 1.8  | 49    | 5   |
| <i>L. pulverulenta</i>  | <i>L. greggii</i>                     |    | 45  | 1.3  | 9.9   | 2.4 |
| <i>L. pulverulenta</i>  | <i>L. lanceolata</i>                  |    | 468 | 4.4  | 2948  | 67  |
| <i>L. pulverulenta</i>  | <i>L. macrophyla</i>                  | ** | 81  | 0.7  | 72.9  | 10  |
| <i>L. pulverulenta</i>  | <i>L. multicapitula</i>               |    | 22  | 1.4  | 0     | 0   |
| <i>L. pulverulenta</i>  | <i>L. pulverulenta</i>                |    | 225 | 0.4  | 0     | 0   |
| <i>L. pulverulenta</i>  | <i>L.retusa</i>                       | ** | 172 | 0.2  | 20.64 | 1.3 |
| <i>L. pulverulenta</i>  | <i>L. salvadorensis</i>               |    | 68  | 0.3  | 0     | 0   |
| <i>L. pulverulenta</i>  | <i>L. shannonii</i>                   |    | 220 | 2.1  | 660   | 32  |
| <i>L. pulverulenta</i>  | <i>L. trichoides</i>                  |    | 30  | 3.3  | 0     | 0   |
| <i>L.retusa</i>         | <i>L. collinsii</i>                   |    | 451 | 0.5  | 270.6 | 8   |
| <i>L.retusa</i>         | <i>L. diversifolia ssp.trichandra</i> |    | 456 | 0.04 | 0     | 0   |
| <i>L.retusa</i>         | <i>L. esculenta</i>                   | ** | 167 | 2.5  | 350.7 | 29  |
| <i>L.retusa</i>         | <i>L. greggii</i>                     |    | 202 | 4.3  | 1555  | 110 |
| <i>L.retusa</i>         | <i>L. lanceolata</i>                  |    | 621 | 0.6  | 31.05 | 0.7 |
| <i>L.retusa</i>         | <i>L. macrophyla</i>                  |    | 127 | 0    | 0     | 0   |
| <i>L.retusa</i>         | <i>L. multicapitula</i>               |    | 15  | 0    | 0     | 0   |
| <i>L.retusa</i>         | <i>L. pulverulenta</i>                | ** | 133 | 2    | 79.8  | 8   |
| <i>L.retusa</i>         | <i>L.retusa</i>                       |    | 756 | 0.07 | 45.36 | 0.9 |
| <i>L.retusa</i>         | <i>L. salvadorensis</i>               |    | 117 | 3.1  | 374.4 | 44  |
| <i>L.retusa</i>         | <i>L. shannonii</i>                   | ** | 283 | 3.8  | 1387  | 69  |
| <i>L.retusa</i>         | <i>L. trichoides</i>                  |    | 149 | 0.1  | 0     | 0   |
| <i>L. salvadorensis</i> | <i>L. collinsii</i>                   | ** | 151 | 1.1  | 211.4 | 20  |
| <i>L. salvadorensis</i> | <i>L. diversifolia ssp.trichandra</i> |    | 207 | 0    | 0     | 0   |
| <i>L. salvadorensis</i> | <i>L. esculenta</i>                   | ** | 163 | 2.3  | 326   | 29  |
| <i>L. salvadorensis</i> | <i>L. greggii</i>                     |    | 44  | 0    | 0     | 0   |
| <i>L. salvadorensis</i> | <i>L. lanceolata</i>                  |    | 17  | 5.3  | 54.4  | 47  |
| <i>L. salvadorensis</i> | <i>L. macrophyla</i>                  |    | 151 | 2    | 0     | 0   |
| <i>L. salvadorensis</i> | <i>L. multicapitula</i>               |    | 6   | 0    | 0     | 0   |
| <i>L. salvadorensis</i> | <i>L. pulverulenta</i>                |    | 75  | 2.5  | 45    | 9   |
| <i>L. salvadorensis</i> | <i>L.retusa</i>                       |    | 150 | 0    | 0     | 0   |
| <i>L. salvadorensis</i> | <i>L. salvadorensis</i>               |    | 195 | 0    | 0     | 0   |
| <i>L. salvadorensis</i> | <i>L. shannonii</i>                   |    | 53  | 3    | 90.1  | 25  |
| <i>L. salvadorensis</i> | <i>L. trichoides</i>                  |    | 70  | 0    | 0     | 0   |

|                      |                                       |    |     |      |       |     |
|----------------------|---------------------------------------|----|-----|------|-------|-----|
| <i>L. shannonii</i>  | <i>L. collinsii</i>                   | *  | 616 | 1.1  | 1109  | 108 |
| <i>L. shannonii</i>  | <i>L. diversifolia ssp.trichandra</i> | ** | 248 | 1.1  | 297.6 | 68  |
| <i>L. shannonii</i>  | <i>L. esculenta</i>                   |    | 466 | 0.4  | 107.2 | 13  |
| <i>L. shannonii</i>  | <i>L. greggii</i>                     |    | 111 | 1.4  | 49.95 | 26  |
| <i>L. shannonii</i>  | <i>L. lanceolata</i>                  | ** | 780 | 0.6  | 561.6 | 41  |
| <i>L. shannonii</i>  | <i>L. macrophyla</i>                  |    | 132 | 0.08 | 0     | 0   |
| <i>L. shannonii</i>  | <i>L. multicapitula</i>               |    | 18  | 0    | 0     | 0   |
| <i>L. shannonii</i>  | <i>L. pulverulenta</i>                |    | 413 | 0.07 | 49.56 | 7   |
| <i>L. shannonii</i>  | <i>L. retusa</i>                      | ** | 305 | 0.1  | 6.1   | 1.2 |
| <i>L. shannonii</i>  | <i>L. salvadorensis</i>               |    | 188 | 1    | 105.3 | 33  |
| <i>L. shannonii</i>  | <i>L. shannonii</i>                   |    | 461 | 0.02 | 9.22  | 1   |
| <i>L. shannonii</i>  | <i>L. trichoides</i>                  |    | 131 | 0    | 0     | 0   |
| <i>L. trichoides</i> | <i>L. collinsii</i>                   |    | 133 | 2.7  | 79.8  | 18  |
| <i>L. trichoides</i> | <i>L. diversifolia ssp.trichandra</i> |    | 178 | 0.8  | 14.24 | 2.3 |
| <i>L. trichoides</i> | <i>L. esculenta</i>                   |    | 74  | 0    | 0     | 0   |
| <i>L. trichoides</i> | <i>L. lanceolata</i>                  | *  | 360 | 3.3  | 720   | 29  |
| <i>L. trichoides</i> | <i>L. macrophyla</i>                  |    | 96  | 1.3  | 20.16 | 6   |
| <i>L. trichoides</i> | <i>L. multicapitula</i>               | ** | 48  | 2.1  | 100.8 | 60  |
| <i>L. trichoides</i> | <i>L. pulverulenta</i>                |    | 67  | 0.4  | 5.36  | 2.1 |
| <i>L. trichoides</i> | <i>L. retusa</i>                      |    | 95  | 0    | 0     | 0   |
| <i>L. trichoides</i> | <i>L. salvadorensis</i>               |    | 56  | 0    | 0     | 0   |
| <i>L. trichoides</i> | <i>L. shannonii</i>                   |    | 201 | 0.4  | 22.11 | 3.3 |
| <i>L. trichoides</i> | <i>L. trichoides</i>                  |    | 77  | 0    | 0     | 0   |

Genus *Leucaena* tetraploids<sup>b</sup> (Sorensen and Brewbaker 1994)

| SP                     | PP                      | MS | SSS | NFLP | PF  | NVS  | CI  |
|------------------------|-------------------------|----|-----|------|-----|------|-----|
| <i>L. diversifolia</i> | <i>L. diversifolia</i>  | SC |     | 613  | 2.9 | 3310 | 100 |
| <i>L. diversifolia</i> | <i>L. leucocephala</i>  | SC | **  | 726  | 3.8 | 3848 | 97  |
| <i>L. diversifolia</i> | <i>L. pallida</i>       | SC | **  | 597  | 1.3 | 1075 | 32  |
| <i>L. diversifolia</i> | <i>L. ssp. "glossy"</i> | SC | *   | 68   | 0.7 | 68   | 18  |

|                         |                         |    |    |      |     |       |     |
|-------------------------|-------------------------|----|----|------|-----|-------|-----|
| <i>L. leucocephala</i>  | <i>L. diversifolia</i>  | SC | ** | 373  | 3.4 | 2723  | 56  |
| <i>L. leucocephala</i>  | <i>L. leucocephala</i>  | SC |    | 597  | 6.2 | 7821  | 100 |
| <i>L. leucocephala</i>  | <i>L. pallida</i>       | SC | ** | 423  | 3.5 | 1311  | 23  |
| <i>L. leucocephala</i>  | <i>L. ssp. "glossy"</i> | SC | ** | 77   | 4.8 | 708.4 | 70  |
| <i>L. pallida</i>       | <i>L. diversifolia</i>  | SI | ** | 1151 | 0.8 | 1611  | 94  |
| <i>L. pallida</i>       | <i>L. leucocephala</i>  | SI | ** | 1661 | 2.4 | 6146  | 251 |
| <i>L. pallida</i>       | <i>L. pallida</i>       | SI |    | 381  | 0.1 | 0     | 0   |
| <i>L. pallida</i>       | <i>L. ssp. "glossy"</i> | SI |    | 363  | 0.2 | 68.97 | 13  |
| <i>L. ssp. "glossy"</i> | <i>L. diversifolia</i>  | SC | *  | 71   | 4.5 | 383.4 | 74  |
| <i>L. ssp. "glossy"</i> | <i>L. leucocephala</i>  | SC | ** | 126  | 8.7 | 882   | 95  |
| <i>L. ssp. "glossy"</i> | <i>L. pallida</i>       | SC |    | 127  | 4.3 | 444.5 | 48  |
| <i>L. ssp. "glossy"</i> | <i>L. ssp. "glossy"</i> | SC |    | 201  | 6.2 | 1467  | 100 |

Genus *Paspalum*<sup>b</sup> (Quarin and Norrman 1990)

| SP                    | PP                     | SSS | PPS    |
|-----------------------|------------------------|-----|--------|
| <i>P. rufum</i>       | <i>P. huamanii</i>     |     | 0      |
| <i>P. rufum</i>       | <i>P. intermedium</i>  |     | 0.0023 |
| <i>P. rufum</i>       | <i>P. brunneum</i>     |     | 0      |
| <i>P. rufum</i>       | <i>P. quadriforium</i> |     | 0      |
| <i>P. huamanii</i>    | <i>P. rufum</i>        |     | 0.0002 |
| <i>P. huamanii</i>    | <i>P. intermedium</i>  | **  | 0.0081 |
| <i>P. huamanii</i>    | <i>P. brunneum</i>     | *   | 0.0006 |
| <i>P. intermedium</i> | <i>P. rufum</i>        |     | 0.0018 |
| <i>P. intermedium</i> | <i>P. huamanii</i>     | **  | 0.0006 |
| <i>P. intermedium</i> | <i>P. brunneum</i>     | **  | 0.0055 |
| <i>P. intermedium</i> | <i>P. quadriforium</i> |     | 0.0006 |

|                        |                       |    |        |
|------------------------|-----------------------|----|--------|
| <i>P. brunneum</i>     | <i>P. rufum</i>       |    | 0.0003 |
| <i>P. brunneum</i>     | <i>P. huamanii</i>    | *  | 0      |
| <i>P. brunneum</i>     | <i>P. intermedium</i> | ** | 0      |
| <i>P. quadriforium</i> | <i>P. rufum</i>       |    | 0      |
| <i>P. quadriforium</i> | <i>P. intermedium</i> |    | 0      |

---

Genus *Phlox*<sup>b</sup> (Levin 1966)

---

| SP                                   | PP                                   | SSS | NFP | NFS |
|--------------------------------------|--------------------------------------|-----|-----|-----|
| <i>P. amoena ssp. amoena</i>         | <i>P. amoena ssp. amoena</i>         |     | 23  | 45  |
| <i>P. amoena ssp. amoena</i>         | <i>P. divaricata ssp. laphamii</i>   | *   | 44  | 11  |
| <i>P. amoena ssp. amoena</i>         | <i>P. pilosa ssp. deamii</i>         |     | 14  | 15  |
| <i>P. amoena ssp. amoena</i>         | <i>P. pilosa ssp. pilosa</i>         |     | 16  | 14  |
| <i>P. amoena ssp. amoena</i>         | <i>P. bifida sp bifida</i>           | *   | 31  | 13  |
| <i>P. amoena ssp. amoena</i>         | <i>P. glaberrima ssp. interior</i>   | *   | 38  | 17  |
| <i>P. amoena ssp. amoena</i>         | <i>P. paniculata</i>                 |     | 9   | 0   |
| <i>P. amoena ssp. amoena</i>         | <i>P. drummondii</i>                 |     | 44  | 1   |
| <i>P. divaricata ssp. divaricata</i> | <i>P. divaricata ssp. divaricata</i> |     | 34  | 65  |
| <i>P. divaricata ssp. divaricata</i> | <i>P. divaricata ssp. laphamii</i>   |     | 15  | 26  |
| <i>P. divaricata ssp. divaricata</i> | <i>P. pilosa ssp. pilosa</i>         |     | 15  | 23  |
| <i>P. divaricata ssp. divaricata</i> | <i>P. glaberrima ssp. interior</i>   |     | 11  | 2   |
| <i>P. divaricata ssp. laphamii</i>   | <i>P. amoena ssp. amoena</i>         | *   | 25  | 22  |
| <i>P. divaricata ssp. laphamii</i>   | <i>P. divaricata ssp. divaricata</i> |     | 40  | 66  |
| <i>P. divaricata ssp. laphamii</i>   | <i>P. divaricata ssp. laphamii</i>   |     | 76  | 138 |
| <i>P. divaricata ssp. laphamii</i>   | <i>P. pilosa ssp. pilosa</i>         |     | 55  | 98  |
| <i>P. divaricata ssp. laphamii</i>   | <i>P. pilosa ssp. detonasa</i>       |     | 44  | 55  |
| <i>P. divaricata ssp. laphamii</i>   | <i>P. pilosa ssp. sangamonensis</i>  |     | 22  | 24  |
| <i>P. divaricata ssp. laphamii</i>   | <i>P. bifida sp bifida</i>           |     | 13  | 2   |

|                                    |                                      |    |     |    |
|------------------------------------|--------------------------------------|----|-----|----|
| <i>P. divaricata ssp. laphamii</i> | <i>P. glaberrima ssp. interior</i>   | *  | 49  | 22 |
| <i>P. divaricata ssp. laphamii</i> | <i>P. maculata ssp. maculata</i>     |    | 24  | 0  |
| <i>P. divaricata ssp. laphamii</i> | <i>P. ovata</i>                      |    | 44  | 8  |
| <i>P. divaricata ssp. laphamii</i> | <i>P. paniculata</i>                 | *  | 38  | 19 |
| <i>P. divaricata ssp. laphamii</i> | <i>P. stolonifera</i>                |    | 49  | 0  |
| <i>P. divaricata ssp. laphamii</i> | <i>P. drummondii</i>                 |    | 47  | 38 |
| <i>P. pilosa ssp. deamii</i>       | <i>P. amoena ssp. amoena</i>         |    | 12  | 10 |
| <i>P. pilosa ssp. deamii</i>       | <i>P. pilosa ssp. deamii</i>         |    | 10  | 24 |
| <i>P. pilosa ssp. deamii</i>       | <i>P. pilosa ssp. pilosa</i>         |    | 32  | 45 |
| <i>P. pilosa ssp. pilosa</i>       | <i>P. amoena ssp. amoena</i>         |    | 20  | 21 |
| <i>P. pilosa ssp. pilosa</i>       | <i>P. divaricata ssp. divaricata</i> |    | 12  | 16 |
| <i>P. pilosa ssp. pilosa</i>       | <i>P. divaricata ssp. laphamii</i>   |    | 15  | 22 |
| <i>P. pilosa ssp. pilosa</i>       | <i>P. pilosa ssp. deamii</i>         |    | 34  | 31 |
| <i>P. pilosa ssp. pilosa</i>       | <i>P. pilosa ssp. pilosa</i>         |    | 23  | 44 |
| <i>P. pilosa ssp. pilosa</i>       | <i>P. pilosa ssp. detonasa</i>       | ** | 51  | 52 |
| <i>P. pilosa ssp. pilosa</i>       | <i>P. pilosa ssp. fulgida</i>        |    | 32  | 14 |
| <i>P. pilosa ssp. pilosa</i>       | <i>P. pilosa ssp. sangamonesis</i>   |    | 26  | 20 |
| <i>P. pilosa ssp. pilosa</i>       | <i>P. nivalis</i>                    |    | 19  | 1  |
| <i>P. pilosa ssp. pilosa</i>       | <i>P. glaberrima ssp. interior</i>   | *  | 50  | 12 |
| <i>P. pilosa ssp. pilosa</i>       | <i>P. ampifolia</i>                  |    | 27  | 6  |
| <i>P. pilosa ssp. pilosa</i>       | <i>P. paniculata</i>                 |    | 15  | 0  |
| <i>P. pilosa ssp. pilosa</i>       | <i>P. drummondii</i>                 |    | 38  | 16 |
| <i>P. pilosa ssp. detonasa</i>     | <i>P. divaricata ssp. laphamii</i>   |    | 17  | 20 |
| <i>P. pilosa ssp. detonasa</i>     | <i>P. pilosa ssp. pilosa</i>         | ** | 47  | 17 |
| <i>P. pilosa ssp. detonasa</i>     | <i>P. pilosa ssp. detonasa</i>       |    | 20  | 40 |
| <i>P. pilosa ssp. detonasa</i>     | <i>P. pilosa ssp. fulgida</i>        |    | 11  | 4  |
| <i>P. pilosa ssp. Detonasa</i>     | <i>P. pilosa ssp. sangamonesis</i>   | *  | 18  | 36 |
| <i>P. pilosa ssp. detonasa</i>     | <i>P. glaberrima ssp. interior</i>   |    | 102 | 0  |
| <i>P. pilosa ssp. fulgida</i>      | <i>P. pilosa ssp. pilosa</i>         |    | 23  | 18 |
| <i>P. pilosa ssp. fulgida</i>      | <i>P. pilosa ssp. detonasa</i>       |    | 9   | 9  |
| <i>P. pilosa ssp. Fulgida</i>      | <i>P. pilosa ssp. fulgida</i>        |    | 17  | 35 |
| <i>P. pilosa ssp. sangamonesis</i> | <i>P. divaricata ssp. laphamii</i>   |    | 10  | 10 |
| <i>P. pilosa ssp. sangamonesis</i> | <i>P. pilosa ssp. pilosa</i>         |    | 28  | 13 |
| <i>P. pilosa ssp. sangamonesis</i> | <i>P. pilosa ssp. detonasa</i>       | *  | 21  | 20 |
| <i>P. pilosa ssp. sangamonesis</i> | <i>P. pilosa ssp. sangamonesis</i>   |    | 35  | 19 |



|                                           |                                             |   |    |    |
|-------------------------------------------|---------------------------------------------|---|----|----|
| <i>P. bifida</i> sp <i>bifida</i>         | <i>P. amoena</i> ssp. <i>amoena</i>         | * | 25 | 1  |
| <i>P. bifida</i> sp <i>bifida</i>         | <i>P. divaricata</i> ssp. <i>laphamii</i>   |   | 17 | 0  |
| <i>P. nivalis</i>                         | <i>P. pilosa</i> ssp. <i>pilosa</i>         |   | 10 | 0  |
| <i>P. glaberrima</i> ssp. <i>interior</i> | <i>P. amoena</i> ssp. <i>amoena</i>         | * | 14 | 0  |
| <i>P. glaberrima</i> ssp. <i>interior</i> | <i>P. divaricata</i> ssp. <i>divaricata</i> |   | 10 | 0  |
| <i>P. glaberrima</i> ssp. <i>interior</i> | <i>P. divaricata</i> ssp. <i>laphamii</i>   | * | 20 | 0  |
| <i>P. glaberrima</i> ssp. <i>interior</i> | <i>P. pilosa</i> ssp. <i>pilosa</i>         | * | 35 | 0  |
| <i>P. glaberrima</i> ssp. <i>interior</i> | <i>P. pilosa</i> ssp. <i>detonasa</i>       |   | 25 | 0  |
| <i>P. maculata</i> ssp. <i>maculata</i>   | <i>P. divaricata</i> ssp. <i>laphamii</i>   |   | 7  | 0  |
| <i>P. ovata</i>                           | <i>P. divaricata</i> ssp. <i>laphamii</i>   |   | 7  | 0  |
| <i>P. ampifolia</i>                       | <i>P. pilosa</i> ssp. <i>pilosa</i>         |   | 7  | 0  |
| <i>P. paniculata</i>                      | <i>P. amoena</i> ssp. <i>amoena</i>         |   | 7  | 0  |
| <i>P. paniculata</i>                      | <i>P. divaricata</i> ssp. <i>laphamii</i>   | * | 9  | 0  |
| <i>P. paniculata</i>                      | <i>P. pilosa</i> ssp. <i>pilosa</i>         |   | 5  | 0  |
| <i>P. stolonifera</i>                     | <i>P. divaricata</i> ssp. <i>laphamii</i>   |   | 11 | 0  |
| <i>P. drummondii</i>                      | <i>P. amoena</i> ssp. <i>amoena</i>         |   | 28 | 0  |
| <i>P. drummondii</i>                      | <i>P. divaricata</i> ssp. <i>laphamii</i>   |   | 13 | 18 |
| <i>P. drummondii</i>                      | <i>P. pilosa</i> ssp. <i>pilosa</i>         |   | 42 | 24 |

Genus *Potentilla*<sup>b</sup> (Davidson and Lenz, 1989)

| SP                               | PP                               | SSS | CI <sub>(seed set)</sub> | CI <sub>(seedlings)</sub> |
|----------------------------------|----------------------------------|-----|--------------------------|---------------------------|
| <i>P. fruticosa</i> (N. America) | <i>P. fruticosa</i> (N. America) |     | 1                        | 1                         |

|                                   |                                   |    |       |       |
|-----------------------------------|-----------------------------------|----|-------|-------|
| <i>P. fruticosa</i> (N. America)  | <i>P. fruticosa</i> (Scandinavia) | *  | 0.026 | 0     |
| <i>P. fruticosa</i> (N. America)  | <i>P. fruticosa</i> (Europe)      | *  | 0.064 | 0     |
| <i>P. fruticosa</i> (N. America)  | <i>P. davurica</i>                | ** | 1.12  | 4.3   |
| <i>P. fruticosa</i> (N. America)  | <i>P. glabra</i>                  | ** | 0.37  | 0.16  |
| <i>P. fruticosa</i> (N. America)  | <i>P. parvifolia</i>              |    | 0.048 | 0.073 |
| <i>P. fruticosa</i> (N. America)  | <i>P. arbuscula</i>               |    | 0.087 | 0.073 |
| <i>P. fruticosa</i> (Scandinavia) | <i>P. fruticosa</i> (N. America)  | *  | 0.02  | 0.016 |
| <i>P. fruticosa</i> (Scandinavia) | <i>P. fruticosa</i> (Scandinavia) |    | 1     | 1     |
| <i>P. fruticosa</i> (Scandinavia) | <i>P. fruticosa</i> (Europe)      | ** | 0.354 | 0.47  |
| <i>P. fruticosa</i> (Scandinavia) | <i>P. davurica</i>                |    | 0.746 | 0     |
| <i>P. fruticosa</i> (Scandinavia) | <i>P. glabra</i>                  |    | 0.295 | 0.34  |
| <i>P. fruticosa</i> (Scandinavia) | <i>P. parvifolia</i>              | *  | 0.332 | 0.407 |
| <i>P. fruticosa</i> (Scandinavia) | <i>P. arbuscula</i>               | ** | 0.117 | 0.122 |
| <i>P. fruticosa</i> (Europe)      | <i>P. fruticosa</i> (N. America)  | ** | 1.63  | 0.94  |
| <i>P. fruticosa</i> (Europe)      | <i>P. fruticosa</i> (Scandinavia) | ** | 0.323 | 0.314 |
| <i>P. fruticosa</i> (Europe)      | <i>P. fruticosa</i> (Europe)      |    | 1     | 1     |
| <i>P. fruticosa</i> (Europe)      | <i>P. davurica</i>                | ** | 8.15  | 7.33  |
| <i>P. fruticosa</i> (Europe)      | <i>P. glabra</i>                  | ** | 1.95  | 0.81  |
| <i>P. fruticosa</i> (Europe)      | <i>P. parvifolia</i>              | *  | 0.486 | 0.12  |
| <i>P. fruticosa</i> (Europe)      | <i>P. arbuscula</i>               | ** | 0.751 | 0.199 |
| <i>P. davurica</i>                | <i>P. fruticosa</i> (N. America)  | ** | 0     | 0     |
| <i>P. davurica</i>                | <i>P. fruticosa</i> (Scandinavia) |    | 1.39  | 1.32  |
| <i>P. davurica</i>                | <i>P. fruticosa</i> (Europe)      | ** | 1.15  | 1.68  |
| <i>P. davurica</i>                | <i>P. davurica</i>                |    | 1     | 1     |
| <i>P. davurica</i>                | <i>P. glabra</i>                  |    | 1.3   | 1.7   |
| <i>P. davurica</i>                | <i>P. parvifolia</i>              | ** | 1.04  | 1.56  |
| <i>P. davurica</i>                | <i>P. arbuscula</i>               | ** | 1.21  | 0.23  |
| <i>P. glabra</i>                  | <i>P. fruticosa</i> (N. America)  | ** | 0     | 0     |
| <i>P. glabra</i>                  | <i>P. fruticosa</i> (Scandinavia) |    | 1.42  | 0.89  |
| <i>P. glabra</i>                  | <i>P. fruticosa</i> (Europe)      | ** | 3.63  | 1.62  |
| <i>P. glabra</i>                  | <i>P. davurica</i>                |    | 1.02  | 0.42  |
| <i>P. glabra</i>                  | <i>P. glabra</i>                  |    | 1     | 1     |
| <i>P. glabra</i>                  | <i>P. parvifolia</i>              | ** | 1.62  | 0.77  |
| <i>P. glabra</i>                  | <i>P. arbuscula</i>               | ** | 6.65  | 4     |
| <i>P. parvifolia</i>              | <i>P. fruticosa</i> (N. America)  | *  | 0.062 | 0.14  |

|                      |                                   |    |      |      |
|----------------------|-----------------------------------|----|------|------|
| <i>P. parvifolia</i> | <i>P. fruticosa</i> (Scandinavia) | *  | 0.7  | 0.15 |
| <i>P. parvifolia</i> | <i>P. fruticosa</i> (Europe)      | ** | 0.09 | 0.11 |
| <i>P. parvifolia</i> | <i>P. davurica</i>                | ** | 0    | 0    |
| <i>P. parvifolia</i> | <i>P. glabra</i>                  |    | 0.23 | 0.14 |
| <i>P. parvifolia</i> | <i>P. parvifolia</i>              |    | 1    | 1    |
| <i>P. parvifolia</i> | <i>P. arbuscula</i>               |    | 0.5  | 0.34 |
| <i>P. arbuscula</i>  | <i>P. fruticosa</i> (N. America)  |    | 0.06 | 0.05 |
| <i>P. arbuscula</i>  | <i>P. fruticosa</i> (Scandinavia) | ** | 1.65 | 1.47 |
| <i>P. arbuscula</i>  | <i>P. fruticosa</i> (Europe)      | ** | 0.97 | 0.95 |
| <i>P. arbuscula</i>  | <i>P. davurica</i>                | ** | 4.5  | 2.95 |
| <i>P. arbuscula</i>  | <i>P. glabra</i>                  | ** | 0.69 | 0.25 |
| <i>P. arbuscula</i>  | <i>P. parvifolia</i>              |    | 0.4  | 0.43 |
| <i>P. arbuscula</i>  | <i>P. arbuscula</i>               |    | 1    | 1    |

---

Genus *Salix*<sup>c</sup> (Mosseler 1990)

| SP                     | PP                     | SSS | NFP | NVF1 |
|------------------------|------------------------|-----|-----|------|
| <i>S. amygdaloides</i> | <i>S. amygdaloides</i> |     | 8   | 8    |
| <i>S. amygdaloides</i> | <i>S. eriocephala</i>  |     | 12  | 0    |
| <i>S. amygdaloides</i> | <i>S. exigua</i>       |     | 10  | 0    |
| <i>S. amygdaloides</i> | <i>S. petiolaris</i>   |     | 7   | 0    |
| <i>S. eriocephala</i>  | <i>S. amygdaloides</i> |     | 7   | 0    |
| <i>S. eriocephala</i>  | <i>S. eriocephala</i>  |     | 19  | 18   |
| <i>S. eriocephala</i>  | <i>S. exigua</i>       | *   | 14  | 1    |
| <i>S. eriocephala</i>  | <i>S. petiolaris</i>   | *   | 14  | 0    |
| <i>S. exigua</i>       | <i>S. amygdaloides</i> |     | 4   | 0    |
| <i>S. exigua</i>       | <i>S. eriocephala</i>  | *   | 12  | 10   |
| <i>S. exigua</i>       | <i>S. exigua</i>       |     | 17  | 12   |
| <i>S. exigua</i>       | <i>S. petiolaris</i>   |     | 14  | 5    |

|                      |                        |   |    |   |
|----------------------|------------------------|---|----|---|
| <i>S. petiolaris</i> | <i>S. amygdaloides</i> |   | 2  | 0 |
| <i>S. petiolaris</i> | <i>S. eriocephala</i>  | * | 10 | 8 |
| <i>S. petiolaris</i> | <i>S. exigua</i>       |   | 6  | 4 |
| <i>S. petiolaris</i> | <i>S. petiolaris</i>   |   | 6  | 5 |

Genus *Silene* (Prentice 1978)

| SP                  | PP                   | MS               | SSS | NFP | NFS | NSG | NSM | F1PV             |
|---------------------|----------------------|------------------|-----|-----|-----|-----|-----|------------------|
| <i>S. alba</i>      | <i>S. alba</i>       | <i>dioecious</i> |     | .   |     |     |     | 75               |
| <i>S. alba</i>      | <i>S. dilcinis</i>   | <i>dioecious</i> |     | 22  | 14  | 3   | 1   | fem <sup>d</sup> |
| <i>S. alba</i>      | <i>S. dioica</i>     | <i>dioecious</i> |     | 2   | 2   | 2   | 2   | 62               |
| <i>S. alba</i>      | <i>S. heuffelii</i>  | <i>dioecious</i> |     | 18  | 16  | 16  | 14  | 55               |
| <i>S. alba</i>      | <i>S. noctiflora</i> | <i>dioecious</i> |     | 11  | 0   | 0   | 0   |                  |
| <i>S. alba</i>      | <i>S. zawadzkii</i>  | <i>dioecious</i> | *   | 6   | 5   | 0   | 0   |                  |
| <i>S. dilcinis</i>  | <i>S. alba</i>       | <i>dioecious</i> |     | 22  | 11  | 2   | 1   | fem <sup>d</sup> |
| <i>S. dilcinis</i>  | <i>S. dilcinis</i>   | <i>dioecious</i> |     |     |     |     |     | 85               |
| <i>S. dilcinis</i>  | <i>S. dioica</i>     | <i>dioecious</i> |     | 25  | 20  | 14  | 14  | 28               |
| <i>S. dilcinis</i>  | <i>S. heuffelii</i>  | <i>dioecious</i> |     | 15  | 13  | 6   | 6   | 47               |
| <i>S. dilcinis</i>  | <i>S. noctiflora</i> | <i>dioecious</i> | *   | 7   | 7   | 0   | 0   |                  |
| <i>S. dilcinis</i>  | <i>S. zawadzkii</i>  | <i>dioecious</i> |     | 6   | 3   | 1   | 1   |                  |
| <i>S. dioica</i>    | <i>S. alba</i>       | <i>dioecious</i> |     | 6   | 6   | 6   | 6   | 48               |
| <i>S. dioica</i>    | <i>S. dilcinis</i>   | <i>dioecious</i> |     | 26  | 21  | 4   | 4   | 47               |
| <i>S. dioica</i>    | <i>S. dioica</i>     | <i>dioecious</i> |     |     |     |     |     | 70               |
| <i>S. dioica</i>    | <i>S. heuffelii</i>  | <i>dioecious</i> | *   | 14  | 14  | 12  | 12  | 45               |
| <i>S. dioica</i>    | <i>S. noctiflora</i> | <i>dioecious</i> | *   | 10  | 7   | 0   | 0   |                  |
| <i>S. dioica</i>    | <i>S. zawadzkii</i>  | <i>dioecious</i> |     | 6   | 5   | 2   | 1   |                  |
| <i>S. heuffelii</i> | <i>S. alba</i>       | <i>dioecious</i> |     | 4   | 4   | 4   | 4   | 5                |
| <i>S. heuffelii</i> | <i>S. dilcinis</i>   | <i>dioecious</i> |     | 3   | 1   | 0   | 0   |                  |
| <i>S. heuffelii</i> | <i>S. dioica</i>     | <i>dioecious</i> | *   | 9   | 5   | 3   | 3   | 74               |

|                      |                      |                  |   |    |   |   |   |    |
|----------------------|----------------------|------------------|---|----|---|---|---|----|
| <i>S. heuffelii</i>  | <i>S. heuffelii</i>  | <i>dioecious</i> |   |    |   |   |   | 77 |
| <i>S. heuffelii</i>  | <i>S. noctiflora</i> | <i>dioecious</i> | 4 | 2  | 0 | 0 |   |    |
| <i>S. noctiflora</i> | <i>S. alba</i>       | <i>SC</i>        | 6 | 0  | 0 | 0 |   |    |
| <i>S. noctiflora</i> | <i>S. dilcinis</i>   | <i>SC</i>        | * | 6  | 0 | 0 | 0 |    |
| <i>S. noctiflora</i> | <i>S. dioica</i>     | <i>SC</i>        | * | 10 | 1 | 0 | 0 |    |
| <i>S. noctiflora</i> | <i>S. heuffelii</i>  | <i>SC</i>        |   | 8  | 0 | 0 | 0 |    |
| <i>S. zawadzki</i>   | <i>S. alba</i>       | <i>dioecious</i> | * | 4  | 0 | 0 | 0 |    |

Genus *Solanum*<sup>a</sup> (Grun 1961)

| SP                   | PP                                 | SSS | NFP | NFS |
|----------------------|------------------------------------|-----|-----|-----|
| <i>S. phureja</i>    | <i>S. phureja</i>                  |     | 34  | 10  |
| <i>S. phureja</i>    | <i>S. stenotomum</i>               |     | 35  | 10  |
| <i>S. phureja</i>    | <i>S. soukupii</i>                 |     | 17  | 23  |
| <i>S. phureja</i>    | <i>S. simplicifolium</i>           | **  | 82  | 3   |
| <i>S. phureja</i>    | <i>S. choacoense</i>               | *   | 24  | 10  |
| <i>S. phureja</i>    | <i>S. chacoense ssp. subtilius</i> |     | 44  | 14  |
| <i>S. phureja</i>    | <i>S. commersonii</i>              | *   | 29  | 1   |
| <i>S. phureja</i>    | <i>S. kurtzianum</i>               |     | 22  | 5   |
| <i>S. phureja</i>    | <i>S. tarijense</i>                |     | 23  | 4   |
| <i>S. stenotomum</i> | <i>S. phureja</i>                  |     | 22  | 10  |
| <i>S. stenotomum</i> | <i>S. stenotomum</i>               |     | 38  | 7   |
| <i>S. stenotomum</i> | <i>S. soukupii</i>                 |     | 19  | 8   |
| <i>S. stenotomum</i> | <i>S. simplicifolium</i>           |     | 28  | 17  |
| <i>S. stenotomum</i> | <i>S. choacoense</i>               |     | 35  | 11  |
| <i>S. stenotomum</i> | <i>S. chacoense ssp. subtilius</i> |     | 65  | 13  |
| <i>S. stenotomum</i> | <i>S. commersonii</i>              |     | 17  | 4   |
| <i>S. stenotomum</i> | <i>S. kurtzianum</i>               |     | 6   | 3   |
| <i>S. stenotomum</i> | <i>S. tarijense</i>                |     | 19  | 6   |

|                                    |                                    |    |     |    |
|------------------------------------|------------------------------------|----|-----|----|
| <i>S. soukupii</i>                 | <i>S. phureja</i>                  |    | 6   | 3  |
| <i>S. soukupii</i>                 | <i>S. stenotomum</i>               |    | 12  | 2  |
| <i>S. soukupii</i>                 | <i>S. soukupii</i>                 |    | 18  | 4  |
| <i>S. soukupii</i>                 | <i>S. simplicifolium</i>           | *  | 22  | 5  |
| <i>S. soukupii</i>                 | <i>S. choacoense</i>               |    | 11  | 1  |
| <i>S. soukupii</i>                 | <i>S. chacoense ssp. subtilius</i> |    | 19  | 3  |
| <i>S. soukupii</i>                 | <i>S. commersonii</i>              |    | 5   | 3  |
| <i>S. soukupii</i>                 | <i>S. kurtzianum</i>               |    | 11  | 1  |
| <i>S. soukupii</i>                 | <i>S. tarijense</i>                | *  | 5   | 5  |
| <i>S. simplicifolium</i>           | <i>S. phureja</i>                  | ** | 12  | 10 |
| <i>S. simplicifolium</i>           | <i>S. stenotomum</i>               |    | 24  | 15 |
| <i>S. simplicifolium</i>           | <i>S. soukupii</i>                 | *  | 27  | 21 |
| <i>S. simplicifolium</i>           | <i>S. simplicifolium</i>           |    | 35  | 17 |
| <i>S. simplicifolium</i>           | <i>S. choacoense</i>               |    | 32  | 14 |
| <i>S. simplicifolium</i>           | <i>S. chacoense ssp. Subtilius</i> | *  | 63  | 23 |
| <i>S. simplicifolium</i>           | <i>S. commersonii</i>              |    | 14  | 8  |
| <i>S. simplicifolium</i>           | <i>S. kurtzianum</i>               |    | 18  | 6  |
| <i>S. simplicifolium</i>           | <i>S. tarijense</i>                | ** | 29  | 16 |
| <i>S. choacoense</i>               | <i>S. phureja</i>                  | *  | 44  | 2  |
| <i>S. choacoense</i>               | <i>S. stenotomum</i>               |    | 22  | 6  |
| <i>S. choacoense</i>               | <i>S. soukupii</i>                 |    | 51  | 19 |
| <i>S. choacoense</i>               | <i>S. simplicifolium</i>           |    | 54  | 13 |
| <i>S. choacoense</i>               | <i>S. choacoense</i>               |    | 12  | 6  |
| <i>S. choacoense</i>               | <i>S. chacoense ssp. subtilius</i> |    | 129 | 50 |
| <i>S. choacoense</i>               | <i>S. commersonii</i>              |    | 5   | 4  |
| <i>S. choacoense</i>               | <i>S. kurtzianum</i>               |    | 20  | 9  |
| <i>S. choacoense</i>               | <i>S. tarijense</i>                | ** | 46  | 29 |
| <i>S. chacoense ssp. subtilius</i> | <i>S. phureja</i>                  |    | 62  | 12 |
| <i>S. chacoense ssp. subtilius</i> | <i>S. stenotomum</i>               |    | 112 | 9  |
| <i>S. chacoense ssp. subtilius</i> | <i>S. soukupii</i>                 |    | 67  | 30 |
| <i>S. chacoense ssp. subtilius</i> | <i>S. simplicifolium</i>           |    | 91  | 15 |
| <i>S. chacoense ssp. subtilius</i> | <i>S. choacoense</i>               |    | 28  | 15 |
| <i>S. chacoense ssp. subtilius</i> | <i>S. chacoense ssp. subtilius</i> |    | 129 | 50 |
| <i>S. chacoense ssp. subtilius</i> | <i>S. commersonii</i>              |    | 5   | 4  |
| <i>S. chacoense ssp. subtilius</i> | <i>S. kurtzianum</i>               | ** | 33  | 24 |
| <i>S. chacoense ssp. subtilius</i> | <i>S. tarijense</i>                | ** | 56  | 23 |

|                       |                                    |    |    |    |
|-----------------------|------------------------------------|----|----|----|
| <i>S. commersonii</i> | <i>S. phureja</i>                  | *  | 15 | 8  |
| <i>S. commersonii</i> | <i>S. stenotomum</i>               |    | 7  | 5  |
| <i>S. commersonii</i> | <i>S. soukupii</i>                 |    | 18 | 13 |
| <i>S. commersonii</i> | <i>S. simplicifolium</i>           |    | 16 | 10 |
| <i>S. commersonii</i> | <i>S. choacoense</i>               |    | 32 | 22 |
| <i>S. commersonii</i> | <i>S. chacoense ssp. subtilius</i> |    | 43 | 16 |
| <i>S. commersonii</i> | <i>S. commersonii</i>              |    | 3  | 2  |
| <i>S. commersonii</i> | <i>S. kurtzianum</i>               |    | 7  | 6  |
| <i>S. commersonii</i> | <i>S. tarijense</i>                | ** | 19 | 17 |
| <i>S. kurtzianum</i>  | <i>S. phureja</i>                  |    | 8  | 3  |
| <i>S. kurtzianum</i>  | <i>S. stenotomum</i>               |    | 15 | 9  |
| <i>S. kurtzianum</i>  | <i>S. soukupii</i>                 |    | 19 | 6  |
| <i>S. kurtzianum</i>  | <i>S. simplicifolium</i>           |    | 33 | 21 |
| <i>S. kurtzianum</i>  | <i>S. choacoense</i>               |    | 42 | 16 |
| <i>S. kurtzianum</i>  | <i>S. chacoense ssp. subtilius</i> | ** | 51 | 3  |
| <i>S. kurtzianum</i>  | <i>S. commersonii</i>              |    | 4  | 3  |
| <i>S. kurtzianum</i>  | <i>S. kurtzianum</i>               |    | 14 | 9  |
| <i>S. kurtzianum</i>  | <i>S. tarijense</i>                | ** | 9  | 5  |
| <i>S. tarijense</i>   | <i>S. phureja</i>                  |    | 15 | 4  |
| <i>S. tarijense</i>   | <i>S. stenotomum</i>               |    | 35 | 5  |
| <i>S. tarijense</i>   | <i>S. soukupii</i>                 | *  | 48 | 19 |
| <i>S. tarijense</i>   | <i>S. simplicifolium</i>           | ** | 35 | 1  |
| <i>S. tarijense</i>   | <i>S. choacoense</i>               | ** | 25 | 2  |
| <i>S. tarijense</i>   | <i>S. chacoense ssp. subtilius</i> | ** | 62 | 1  |
| <i>S. tarijense</i>   | <i>S. commersonii</i>              | ** | 15 | 0  |
| <i>S. tarijense</i>   | <i>S. kurtzianum</i>               | *  | 23 | 2  |
| <i>S. tarijense</i>   | <i>S. tarijense</i>                |    | 20 | 3  |

---

Genus *Ulmus* (Mittempergher and La Porta 1981)

---

SP

PP

MS

SSS

PFS

---

|                        |                        |    |    |      |
|------------------------|------------------------|----|----|------|
| <i>U. carpinifolia</i> | <i>U. carpinifolia</i> | SC |    | 3.4  |
| <i>U. carpinifolia</i> | <i>U. pumila</i>       | SC | ** | 31.3 |
| <i>U. carpinifolia</i> | <i>U. laevis</i>       | SC | *  | 2.2  |
| <i>U. carpinifolia</i> | <i>U. parvifolia</i>   | SC | ** | 26.2 |
| <i>U. glabra</i>       | <i>U. glabra</i>       | SC |    | 1.2  |
| <i>U. glabra</i>       | <i>U. pumila</i>       | SC | ** | 1.2  |
| <i>U. glabra</i>       | <i>U. laevis</i>       | SC | *  | 2.6  |
| <i>U. glabra</i>       | <i>U. elliptica</i>    | SC | ** | 18.1 |
| <i>U. glabra</i>       | <i>U. wilsoniana</i>   | SC | ** | 39.8 |
| <i>U. glabra</i>       | <i>U. chenmoui</i>     | SC | ** | 27.1 |
| <i>U. glabra</i>       | <i>U. japonica</i>     | SC | ** | 46.3 |
| <i>U. glabra</i>       | <i>U. parvifolia</i>   | SC | ** | 5.7  |
| <i>U. glabra</i>       | <i>U. villosa</i>      | SC |    | 4.1  |
| <i>U. hollandica</i>   | <i>U. hollandica</i>   | SI |    | 0.6  |
| <i>U. hollandica</i>   | <i>U. elliptica</i>    | SI | ** | 0.4  |
| <i>U. hollandica</i>   | <i>U. japonica</i>     | SI | ** | 61.4 |
| <i>U. hollandica</i>   | <i>U. parvifolia</i>   | SI | ** | 0.2  |
| <i>U. pumila</i>       | <i>U. carpinifolia</i> | SI | ** | 47.2 |
| <i>U. pumila</i>       | <i>U. glabra</i>       | SI | ** | 73.7 |
| <i>U. pumila</i>       | <i>U. pumila</i>       | SI |    | 0.2  |
| <i>U. pumila</i>       | <i>U. laevis</i>       | SI |    | 0.1  |
| <i>U. pumila</i>       | <i>U. wilsoniana</i>   | SI | ** | 38   |
| <i>U. pumila</i>       | <i>U. parvifolia</i>   | SI | ** | 10.2 |
| <i>U. laevis</i>       | <i>U. carpinifolia</i> | SI | *  | 0.5  |
| <i>U. laevis</i>       | <i>U. glabra</i>       | SI | *  | 0.9  |
| <i>U. laevis</i>       | <i>U. pumila</i>       | SI |    | 0.8  |
| <i>U. laevis</i>       | <i>U. laevis</i>       | SI |    | 0.7  |
| <i>U. laevis</i>       | <i>U. japonica</i>     | SI | ** | 0.3  |
| <i>U. laevis</i>       | <i>U. parvifolia</i>   | SI | ** | 1.1  |
| <i>U. elliptica</i>    | <i>U. glabra</i>       | SI | ** | 60.8 |
| <i>U. elliptica</i>    | <i>U. hollandica</i>   | SI | ** | 77   |
| <i>U. elliptica</i>    | <i>U. elliptica</i>    | SI |    | 0.7  |
| <i>U. elliptica</i>    | <i>U. wilsoniana</i>   | SI | ** | 69.6 |



|                      |                        |    |    |      |
|----------------------|------------------------|----|----|------|
| <i>U. elliptica</i>  | <i>U. parvifolia</i>   | SI | ** | 13.8 |
| <i>U. wilsoniana</i> | <i>U. glabra</i>       | SI | ** | 7.6  |
| <i>U. wilsoniana</i> | <i>U. pumila</i>       | SI | ** | 1.6  |
| <i>U. wilsoniana</i> | <i>U. elliptica</i>    | SI | ** | 12.1 |
| <i>U. wilsoniana</i> | <i>U. wilsoniana</i>   | SI |    | 0.3  |
| <i>U. wilsoniana</i> | <i>U. parvifolia</i>   | SI | ** | 1.4  |
| <i>U. chenmoui</i>   | <i>U. glabra</i>       | SI | ** | 0.8  |
| <i>U. chenmoui</i>   | <i>U. chenmoui</i>     | SI |    | 0    |
| <i>U. chenmoui</i>   | <i>U. parvifolia</i>   | SI | ** | 0    |
| <i>U. japonica</i>   | <i>U. glabra</i>       | SC | ** | 28.2 |
| <i>U. japonica</i>   | <i>U. hollandica</i>   | SC | ** | 77.4 |
| <i>U. japonica</i>   | <i>U. laevis</i>       | SC | ** | 51.8 |
| <i>U. japonica</i>   | <i>U. japonica</i>     | SC |    | 10.7 |
| <i>U. japonica</i>   | <i>U. parvifolia</i>   | SC | *  | 11.5 |
| <i>U. parvifolia</i> | <i>U. carpinifolia</i> | SC | ** | 14.6 |
| <i>U. parvifolia</i> | <i>U. glabra</i>       | SC | ** | 16.4 |
| <i>U. parvifolia</i> | <i>U. hollandica</i>   | SC | ** | 3.9  |
| <i>U. parvifolia</i> | <i>U. pumila</i>       | SC | ** | 18   |
| <i>U. parvifolia</i> | <i>U. laevis</i>       | SC | ** | 12.1 |
| <i>U. parvifolia</i> | <i>U. elliptica</i>    | SC | ** | 4.8  |
| <i>U. parvifolia</i> | <i>U. wilsoniana</i>   | SC | ** | 7.8  |
| <i>U. parvifolia</i> | <i>U. chenmoui</i>     | SC | ** | 7.1  |
| <i>U. parvifolia</i> | <i>U. japonica</i>     | SC | *  | 16.5 |
| <i>U. parvifolia</i> | <i>U. parvifolia</i>   | SC |    | 4.2  |

---

<sup>a</sup> No information on the mating system of the species.

<sup>b</sup> All species are self-incompatible.

<sup>c</sup> All species are dioecious.

<sup>d</sup> female

## REFERENCES

- Dagne, K. 1994. Meiosis in interspecific hybrids and genomic interrelationships in *Guizotia* Cass. (Compositae). *Hereditas* 121: 119-129.
- Davidson, C. G. and L. M. Lenz. 1989. Experimental taxonomy of *Potentilla fruticosa*. *Can. Jour. Bot.* 67: 3520-3528.
- Diaz J., P. Schmiediche, and D.F. Austin. 1996. Polygon of crossability between eleven species of *Ipomoea*: section *Batatas* (Convolvulaceae). *Euphytica* 88: 189-200.
- Ferguson C. J., D. A. Levin, and R. K. Jansen. 1999. Natural hybridization between an outcrossing and a selfing *Phlox* (Polemoniaceae): the maternal species of F1 hybrids. *Plant Syst. and Evol.* 218: 153-158.
- Gremaud, M. 1981. Recherches de taxonomie experimentale sur le *Carduus defloratus* L. s. l. (Compositae) III. Hybridation experimentale cytologie des hybrides F<sub>1</sub>; donnees carpologiques et palynologiques. *Rev. Cytol. Biol. Veget. – Bot.* 4: 207-268.
- Grun, P. 1961. Early stages in the formation of internal barriers to gene exchange between diploid species of *Solanum*. *Amer. Jour. Bot.* 48:79-89.
- Levin, D. 1966. The *Phlox pilosa* complex: Crossing and chromosome relationships. *Brittonia* 18:143-162.
- McDade, L. A. and J. G. Lundberg. 1982. A new tabular and diagrammatic method for displaying artificial hybridization data with an example from *Aphelandra* (Acanthaceae). *Syst Bot* 7: 13-25.
- Mittempergher L. and N. La Porta. 1981. Hybridization studies in the Eurasian species of elm (*Ulmus* spp.). *Silvae Genetica* 40: 237-243.
- Prentice, H. C. 1978. Experimental taxonomy of *Silene* section *Elisanthe* (Caryophyllaceae): crossing experiments. *Bot. Jour. Linnean Soc.* 77: 203-216.

Quarin, C. L. and G. A. Norrman. 1990. Interspecific hybrids between 5 *Paspalum* species. Bot. Gaz. 151: 366-369.

Singh, A. K. and K. S. Yadava. 1984. An analysis of interspecific hybrids and phylogenetic implication in *Cucumis* (Cucurbitaceae). Plant Syst. and Evol. 147:237-252.

Sorensson, C. T. and J. L. Brewbaker. 1994. Interspecific compatibility among 15 *Leucaena* species (Leguminosae: Mimosoideae) via artificial hybridizations. Am. Jour. Bot. 81: 240-247.

Wells, E. F. 1979. Interspecific hybridization in eastern North American *Heuchera* (Saxifragaceae). Syst Bot. 4: 319-338.
